# Supplementary material for: Centrality-based pathway enrichment: a systematic approach for finding significant pathways dominated by key genes
Source: PubMed Central journal article supplement (PMC3443660; doi:10.1186/1752-0509-6-56), 2012-06-06

ER random network (200 nodes)

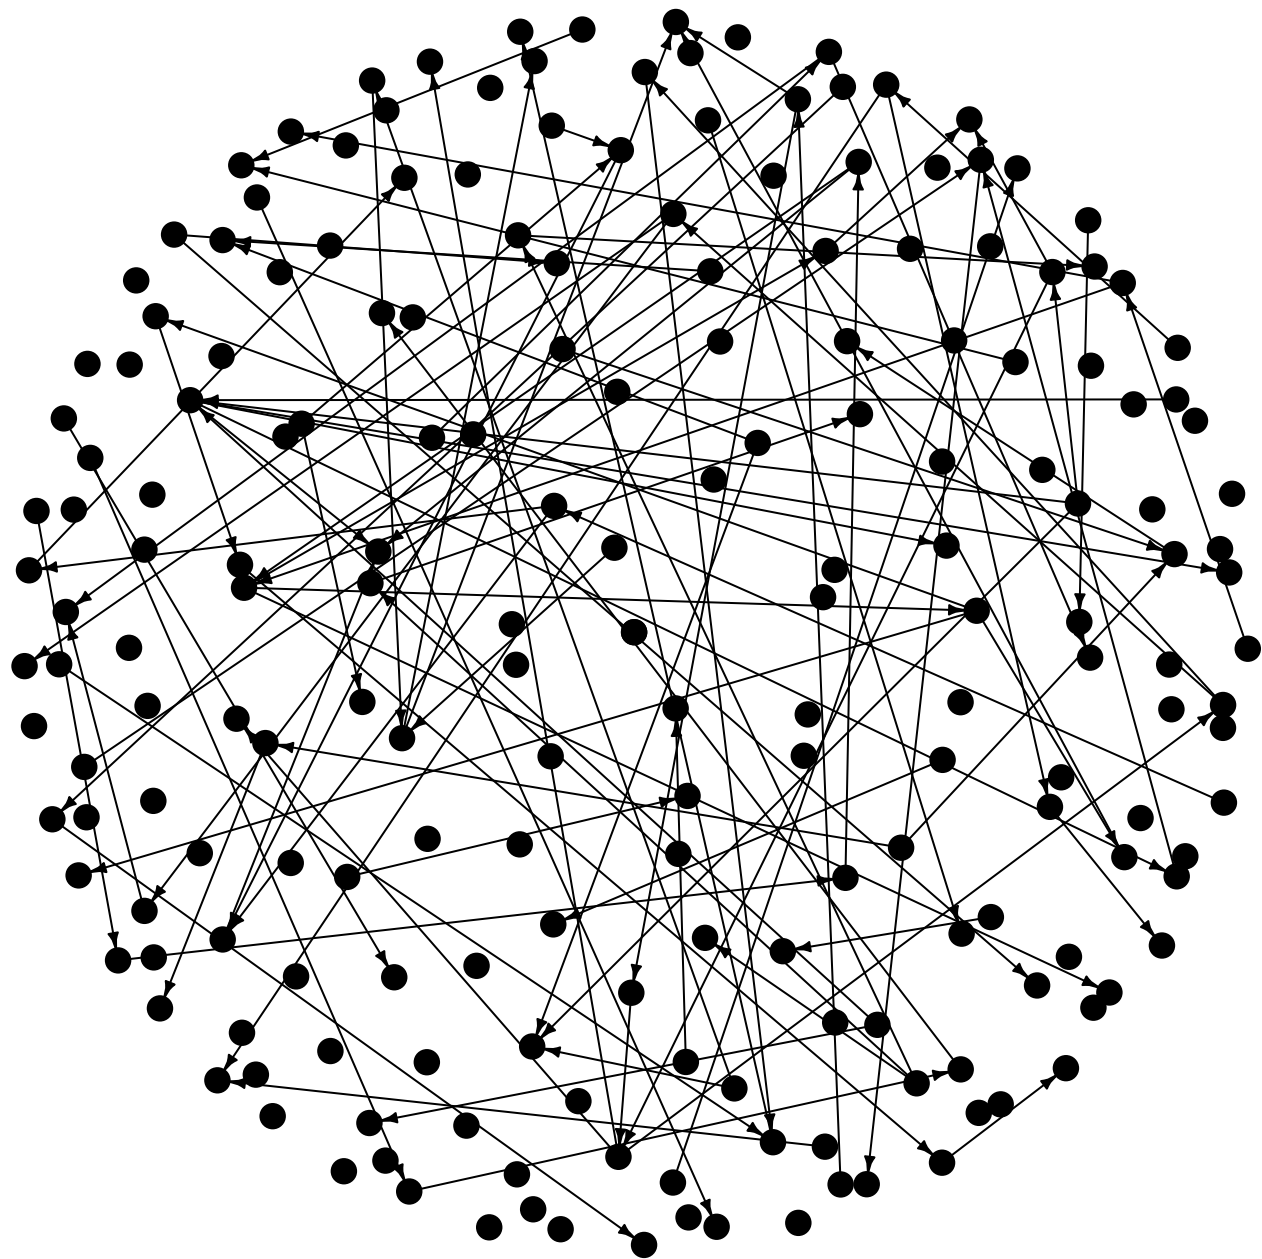

BA random network (200 nodes)

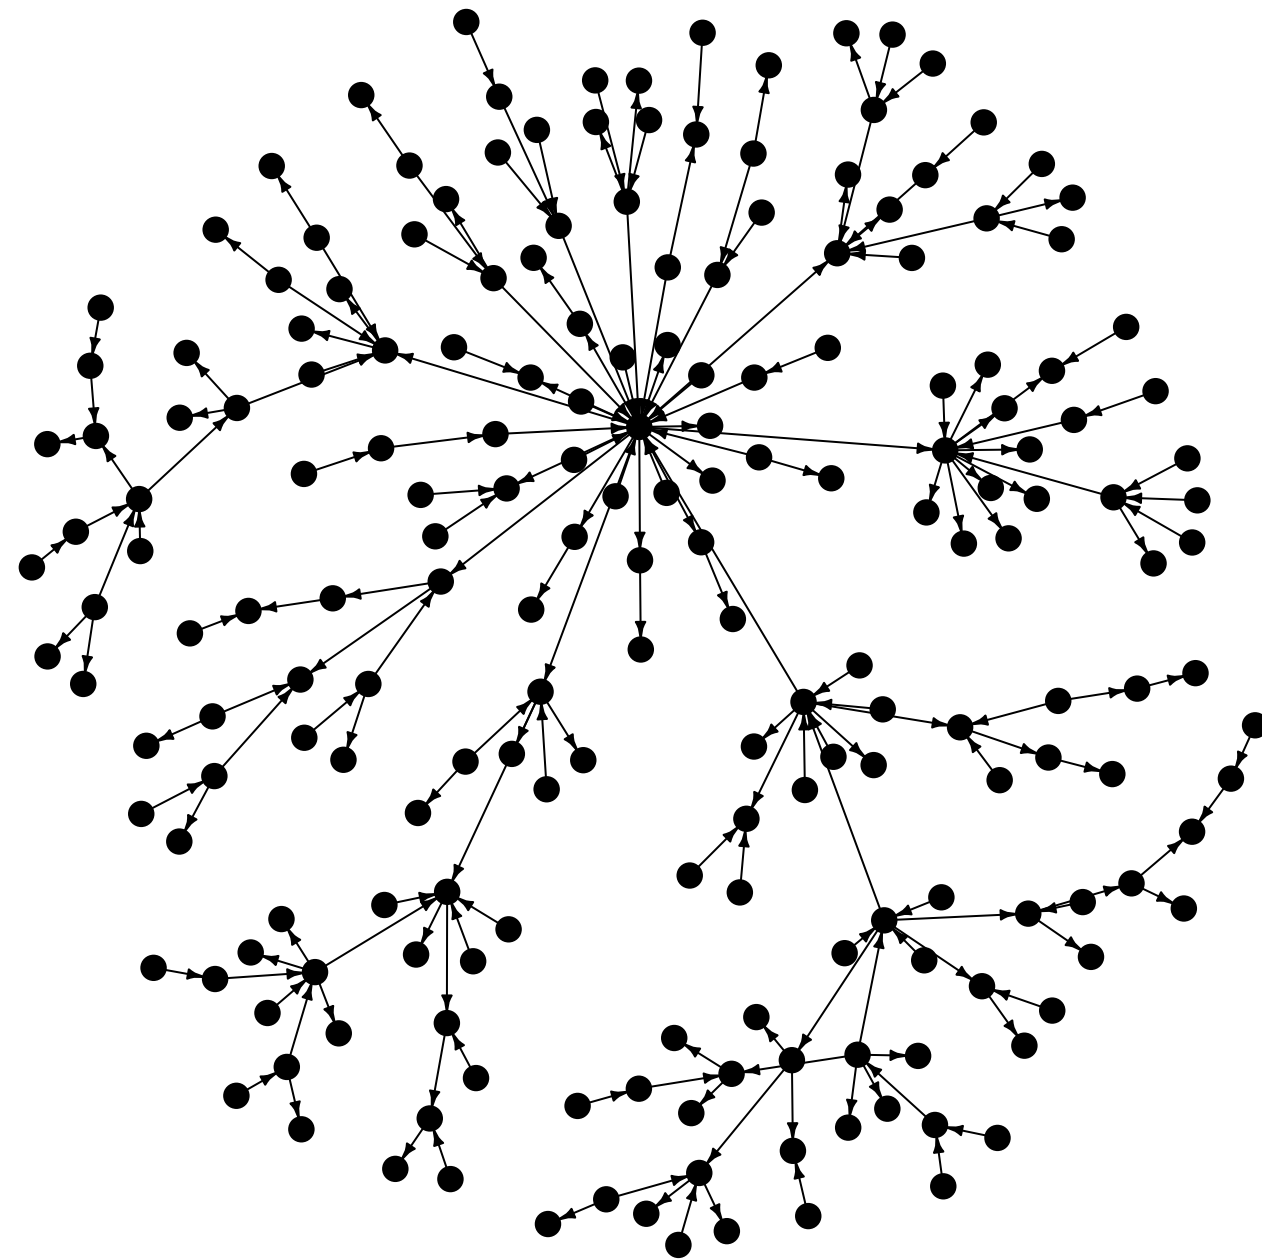

Supplement: 1752-0509-6-56-S1.pdf [file 1752-0509-6-56-S1.pdf]
