# Supplementary material for: Centrality-based pathway enrichment: a systematic approach for finding significant pathways dominated by key genes
Source: PubMed Central journal article supplement (PMC3443660; doi:10.1186/1752-0509-6-56), 2012-06-06

**Histogram of in-largest reaches  
aggregated from 1000 ER networks**

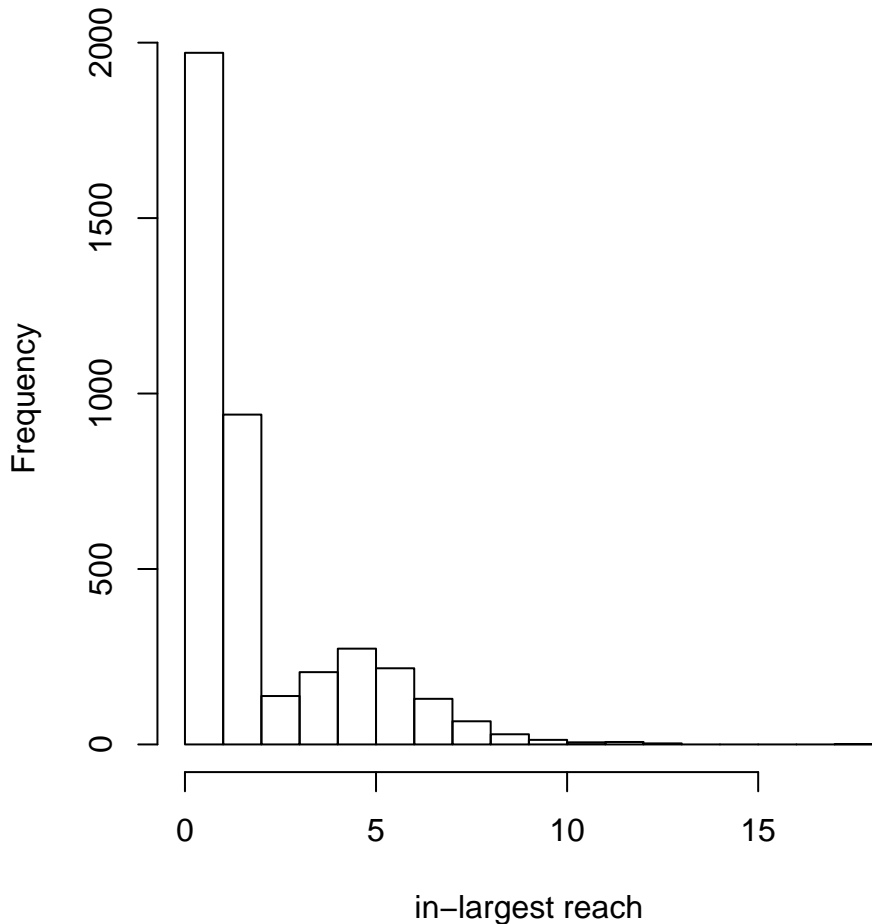

**Histogram of in-largest reaches  
aggregated from 1000 BA networks**

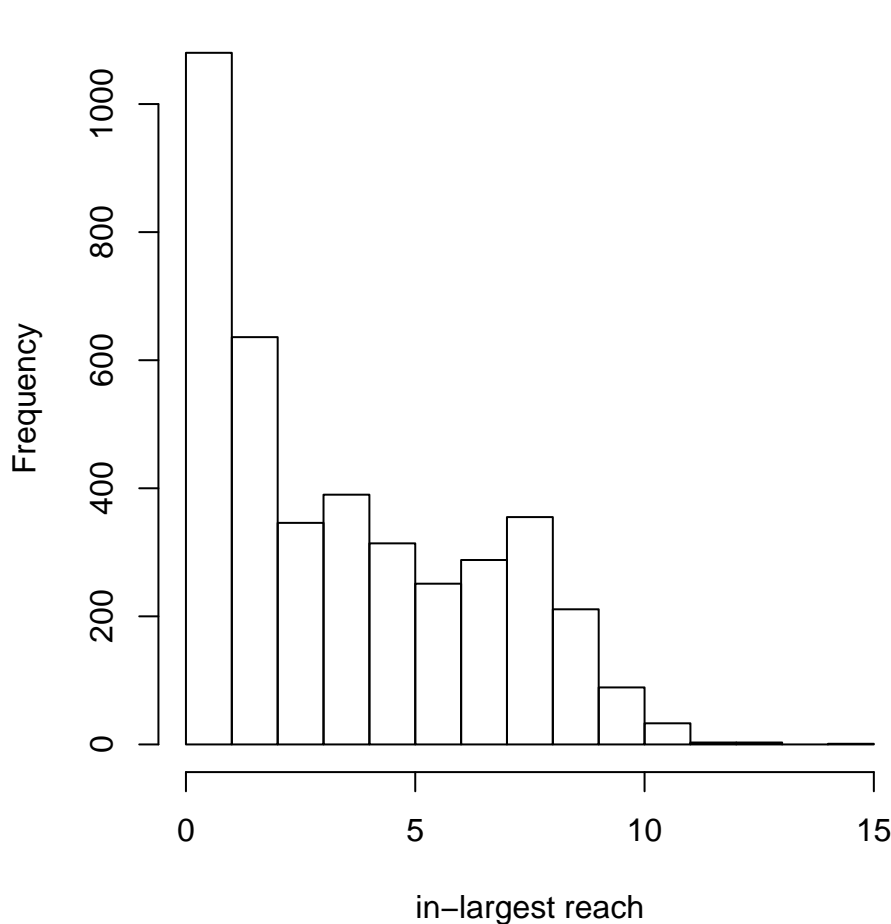

Supplement: 1752-0509-6-56-S2.pdf [file 1752-0509-6-56-S2.pdf]
